# Supplementary material
Source: PubMed Central journal article supplement (PMC5648857)
Supplement: JB.00472-17_zjb999094572s1.pdf [file JB.00472-17_zjb999094572s1.pdf]

**Table S1.** Bacterial strains and plasmids used in this study

| Strain or plasmid                                    | Genotype and/or relevant characteristics                                                                                                   | Reference or source              |
|------------------------------------------------------|--------------------------------------------------------------------------------------------------------------------------------------------|----------------------------------|
| <b><i>P. aeruginosa</i></b>                          |                                                                                                                                            |                                  |
| PAO1 (ATCC15692)                                     | Prototroph                                                                                                                                 | American type culture collection |
| <i>fur</i>                                           | <i>fur</i> conditional mutant of PAO1, deleted of the <i>fur</i> coding sequence and carrying an arabinose-dependent copy of <i>fur</i>    | 27                               |
| <i>lptH</i>                                          | <i>lptH</i> conditional mutant of PAO1, deleted of the <i>lptH</i> coding sequence and carrying an arabinose-dependent copy of <i>lptH</i> | 32                               |
| PAO1 $\Delta$ <i>tonB1</i>                           | PAO1 deleted of the <i>tonB1</i> coding sequence                                                                                           | 36                               |
| PAO1 $\Delta$ <i>pvdA</i>                            | PAO1 deleted of the <i>pvdA</i> coding sequence                                                                                            | 60                               |
| PAO1 $\Delta$ <i>pchD</i>                            | PAO1 deleted of the <i>pchD</i> coding sequence                                                                                            | 56                               |
| PAO1 $\Delta$ <i>pvdA</i> $\Delta$ <i>pchD</i>       | PAO1 deleted of the <i>pvdA</i> and <i>pchD</i> coding sequences                                                                           | 66                               |
| <i>fur</i> $\Delta$ <i>pvdA</i>                      | <i>fur</i> conditional mutant deleted of the <i>pvdA</i> coding sequence                                                                   | This work                        |
| <i>fur</i> $\Delta$ <i>pchD</i>                      | <i>fur</i> conditional mutant deleted of the <i>pchD</i> coding sequence                                                                   | This work                        |
| <i>fur</i> $\Delta$ <i>pvdA</i> $\Delta$ <i>pchD</i> | <i>fur</i> deleted of the <i>pvdA</i> and <i>pchD</i> coding sequences                                                                     | This work                        |
| <i>fur</i> 2I                                        | <i>fur</i> conditional mutant with a transposon insertion in the <i>pchE</i> gene                                                          | This work                        |
| <i>fur</i> 1A                                        | <i>fur</i> conditional mutant with a transposon insertion in the <i>pchH</i> gene                                                          | This work                        |
| <i>fur</i> 2F                                        | <i>fur</i> conditional mutant with a transposon insertion in the <i>pchR</i> gene                                                          | This work                        |
| <i>fur</i> 1B                                        | <i>fur</i> conditional mutant with a transposon insertion in the P <sub>BAD</sub> promoter region                                          | This work                        |
| <i>fur</i> 2C                                        | <i>fur</i> conditional mutant with a transposon insertion in the P <sub>BAD</sub> promoter region                                          | This work                        |
| <i>fur</i> 2E                                        | <i>fur</i> conditional mutant with a transposon insertion in the <i>araC</i> gene                                                          | This work                        |
| <b><i>P. syringae</i> pv. <i>tabaci</i></b>          |                                                                                                                                            |                                  |
| ATCC15692                                            | Prototroph                                                                                                                                 | American type culture collection |
| BL33                                                 | ATCC15692 <i>fur</i> deletion mutant                                                                                                       | 24                               |
| <b><i>E. coli</i></b>                                |                                                                                                                                            |                                  |
| S17.1 $\lambda$ <i>pir</i>                           | <i>thi pro hsdRhsdM<sup>+</sup> recA RP4-2-Tc::Mu-Km::Tn7 <math>\lambda</math>pir, Gm<sup>R</sup></i>                                      | 67                               |
| <b>Plasmid</b>                                       |                                                                                                                                            |                                  |
| pLM1                                                 | Tn5 delivery vector, Gm <sup>R</sup>                                                                                                       | 61                               |
| pDM4 $\Delta$ <i>pchD</i>                            | pDM4 derivative for <i>pchD</i> in-frame deletion, Cm <sup>R</sup>                                                                         | 56                               |
| pEX18Tc $\Delta$ <i>pvdA</i>                         | pEX18Tc derivative for <i>pvdA</i> deletion, Gm <sup>R</sup> , Tc <sup>R</sup>                                                             | 60                               |
| pMRP9-1                                              | pUCP18-derivative which constitutively expresses the GFP protein, Cb <sup>R</sup>                                                          | 68                               |
| pME6032                                              | IPTG inducible expression vector, Tc <sup>R</sup>                                                                                          | 59                               |
| pME <i>katA</i>                                      | pME6032-derivative carrying an IPTG-inducible copy of <i>katA</i> (PA4236)                                                                 | This work                        |
| pME <i>sodB</i>                                      | pME6032-derivative carrying an IPTG-inducible copy of <i>sodB</i> (PA4366)                                                                 | This work                        |
| pME <i>bfrB</i>                                      | pME6032-derivative carrying an IPTG-inducible copy of <i>bfrB</i> (PA3531)                                                                 | This work                        |
| pMP220:: <i>PpvdS</i>                                | Promoter of <i>pvdS</i> directionally cloned into pMP220, Tc <sup>R</sup>                                                                  | 69                               |

|               |                                                                           |    |
|---------------|---------------------------------------------------------------------------|----|
| pMP220::PpchR | Promoter of <i>pchR</i> directionally cloned into pMP220, Tc <sup>R</sup> | 70 |
| pLAFR3        | Empty cosmid, Tc <sup>R</sup>                                             | 71 |
| pME3300       | pLAFR3 carrying the genes for pyochelin biosynthesis from PAO1            | 47 |

---

References non included in the main text:

66. Visca P, Bonchi C, Minandri F, Frangipani E, Imperi F. 2013. The dual personality of iron chelators: growth inhibitors or promoters? *Antimicrob Agents Chemother* 57:2432-2433.
67. Simon R, Priefer U, Pühler A. 1983. A broad host range mobilization system for in vivo genetic engineering: transposon mutagenesis in Gram negative bacteria. *Bio/Technology* 1:784-790.
68. Davies DG, Parsek MR, Pearson JP, Iglewski BH, Costerton JW, Greenberg EP. 1998. The involvement of cell-to-cell signals in the development of a bacterial biofilm. *J Bacteriol* 280:295-298.
69. Ambrosi C, Leoni L, Visca P. 2002. Different responses of pyoverdine genes to autoinduction in *Pseudomonas aeruginosa* and the group *Pseudomonas fluorescens-Pseudomonas putida*. *Appl Environ Microbiol* 68:4122-4126.
70. Frangipani E, Visaggio D, Heeb S, Kaever V, Cámara M, Visca P, Imperi F. 2014. The Gac/Rsm and cyclic-di-GMP signalling networks coordinately regulate iron uptake in *Pseudomonas aeruginosa*. *Environ Microbiol* 16:676-688.
71. Staskawicz B, Dahlbeck D, Keen N, Napoli C. 1987. Molecular characterization of cloned avirulence genes from race 0 and race 1 of *Pseudomonas syringae* pv. *glycinea*. *J Bacteriol* 169:5789-5794.
