# Supplementary material
Source: PubMed Central journal article supplement (PMC5648857)
Supplement: JB.00472-17_zjb999094572s2.pdf [file JB.00472-17_zjb999094572s2.pdf]

**Table S2.** Primers used in this study <sup>a</sup>

| <b>Primer name</b>      | <b>Sequence (5'→3')<sup>b</sup></b>  | <b>Restriction site</b> | <b>Application</b>                         |
|-------------------------|--------------------------------------|-------------------------|--------------------------------------------|
| <i>katA</i> _pME6032_FW | <u>cggaattc</u> ATGGAAGAGAAGACCCGCC  | EcoRI                   | Generation of pME <i>katA</i>              |
| <i>katA</i> _pME6032_RV | ggggtaccTCAGTCCAGCTTCAGGCC           | KpnI                    | Generation of pME <i>katA</i>              |
| <i>sodB</i> _pME6032_FW | <u>cggaattc</u> ATGGCTTTCGAATTGCCGC  | EcoRI                   | Generation of pME <i>sodB</i>              |
| <i>sodB</i> _pME6032_RV | ccgctcgagGTTCTGATCAGACTCAGGC         | XhoI                    | Generation of pME <i>sodB</i>              |
| <i>bfrB</i> _pME6032_FW | <u>cggaattc</u> CATGAAAGGCGACAAGAAAG | EcoRI                   | Generation of pME <i>bfrB</i>              |
| <i>bfrB</i> _pME6032_RV | ccgctcgAGGCCGCCGCGCTTC               | XhoI                    | Generation of pME <i>bfrB</i>              |
| TnpRL13-2               | CAGCAACACCTTCTCACGA                  |                         | Sequencing of transposon insertion mutants |
| TnpRL17-1               | AACAAGCCAGGGATGTAACG                 |                         | Sequencing of transposon insertion mutants |

<sup>a</sup> Unless otherwise stated, PCRs were performed using the genomic DNA of *P. aeruginosa* PAO1 as the template.

<sup>b</sup> The restriction site used for cloning is underlined in the primer sequence.
