# Supplementary material
Source: PubMed Central journal article supplement (PMC5648857)
Supplement: JB.00472-17_zjb999094572s3.pdf [file JB.00472-17_zjb999094572s3.pdf]

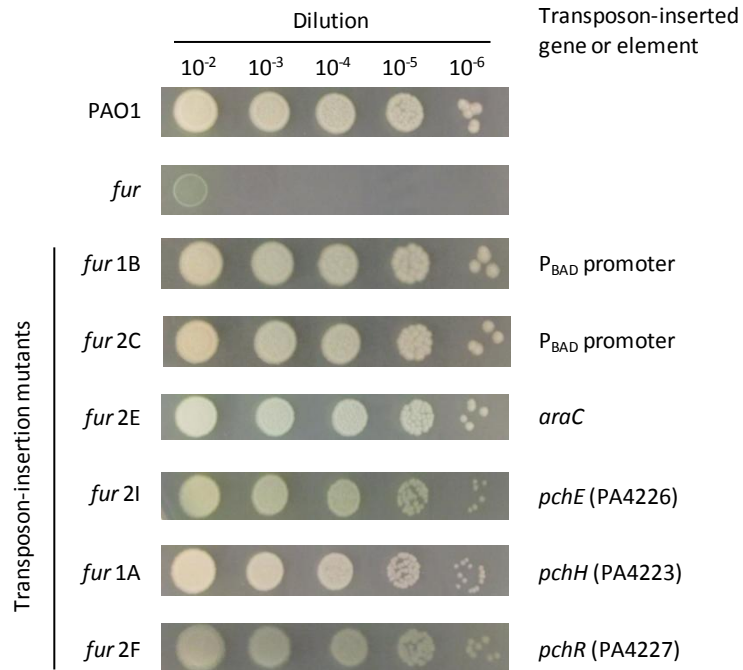

**Figure S1.** Colony growth of the *P. aeruginosa* wild type PAO1, the *fur* conditional mutant and the transposon-insertion mutants 2I, 1A, 2F, 1B, 2c and 2E (Table 1) on MH agar plates after 20 h of growth at 37°C. The images are representative of two independent experiments giving similar results.
