# Supplementary material
Source: PubMed Central journal article supplement (PMC5648857)
Supplement: JB.00472-17_zjb999094572s4.pdf [file JB.00472-17_zjb999094572s4.pdf]

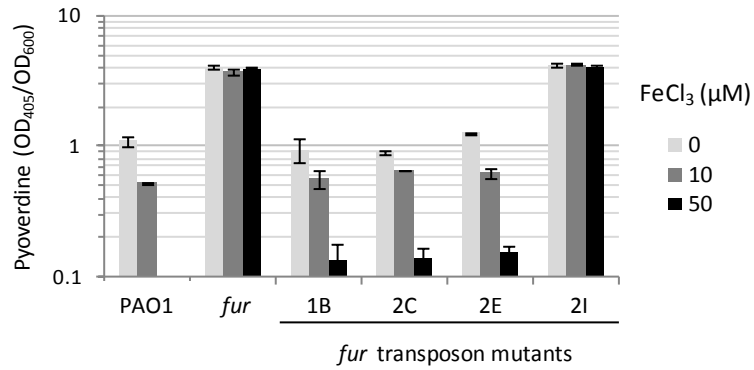

**Figure S2.** The transposon-insertion mutants *fur* 1B, *fur* 2C and *fur* 2E show a functional Fur-mediated repression of iron-regulated genes. Pyoverdine production by the wild type strain PAO1, the *fur* conditional mutant and the transposon-insertion mutants 1B, 2C, 2E (transposon insertion in the *araCP*<sub>BAD</sub> region) and 2I (transposon insertion in *pchE*; Table S1) in TSBD medium supplemented with increasing concentrations of iron (0-50 μM FeCl<sub>3</sub>), after 14 h of growth in microtiter plates at 37°C and 200 rpm. Results are the mean (± SD) of two independent assays.
