# Supplementary material
Source: PubMed Central journal article supplement (PMC5648857)
Supplement: JB.00472-17_zjb999094572s5.pdf [file JB.00472-17_zjb999094572s5.pdf]

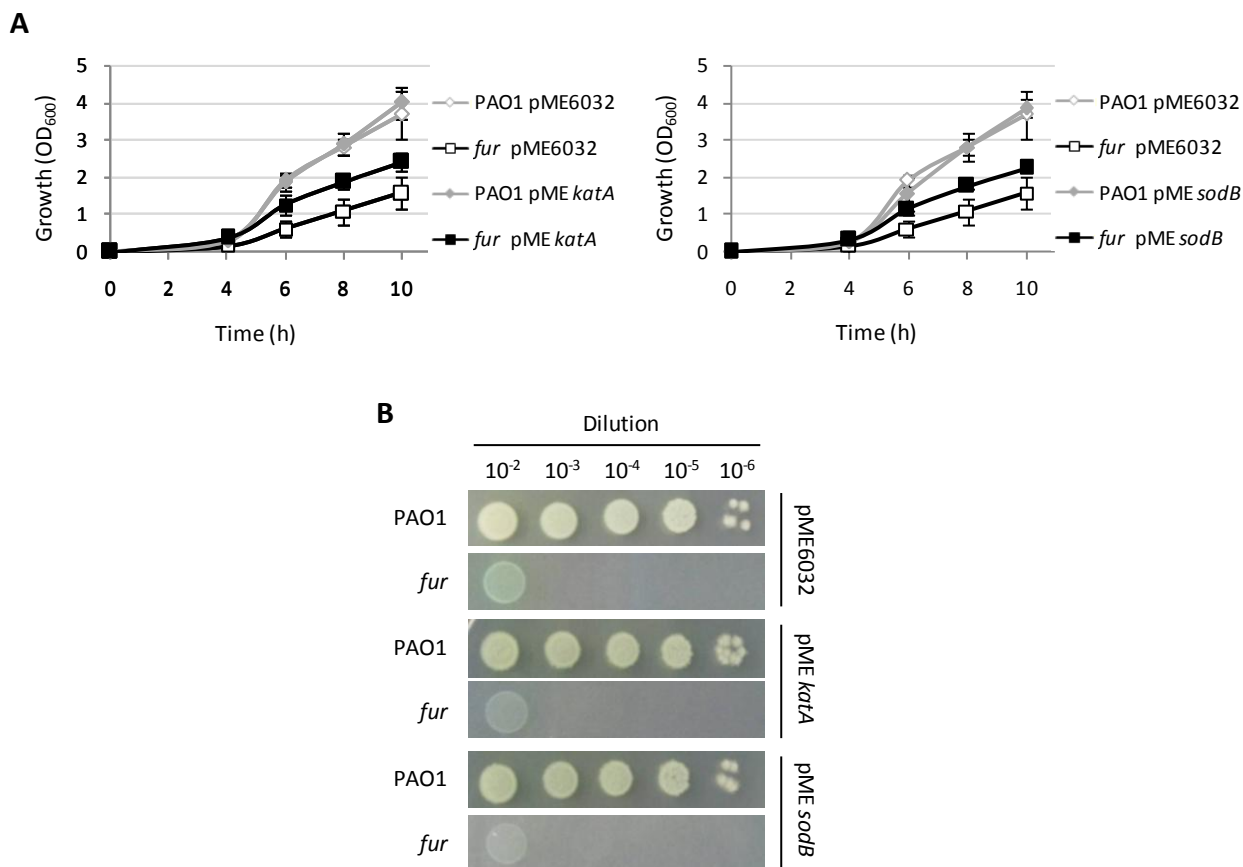

**Figure S3.** (A) Growth ( $OD_{600}$ ) of the *P. aeruginosa* wild type PAO1 and the *fur* conditional mutant carrying IPTG-inducible constructs expressing the catalase KatA (left panel) or the superoxide dismutase SodB (right panel), or the empty vector pME6032 as control, in MH supplemented with 0.5 mM IPTG in flasks at 37°C and vigorous agitation (200 rpm). Values are the mean ( $\pm$  SD) of three independent assays. (B) Colony growth of the same strains described in panel A on MH agar supplemented with 0.5 mM IPTG after 20 h at 37°C. The images are representative of three experiments giving similar results.
